# Supplementary material for: Participation of Patients From Racial and Ethnic Minority Groups in Phase 1 Early Cancer Drug Development Trials in the US, 2000-2018
Source: PubMed Central journal article supplement (PMC9634497; doi:10.1001/jamanetworkopen.2022.39884), 2022-11-03
Supplement: jamanetwopen-e2239884-s001.pdf [file jamanetwopen-e2239884-s001.pdf]

## Supplementary Online Content

Dunlop H, Fitzpatrick E, Kurti K, et al. Participation of patients from racial and ethnic minority groups in phase 1 early cancer drug development trials in the US, 2000-2018. *JAMA Netw Open*. 2022;5(11):e2239884.

doi:10.1001/jamanetworkopen.2022.39884

**eTable.** Demographics of Participants in All Phase I Trials, Industry Funded Trials, and Trials Conducted at Academic Centers Including Trials Targeting EGFR+ Non-Small Cell Lung Cancers

**eFigure.** Incidence by Race and Ethnicity in All Phase I Trials Including Trials Targeting EGFR+ Non-Small Cell Lung Cancers

This supplementary material has been provided by the authors to give readers additional information about their work.

**eTable.** Demographics of Participants in All Phase I Trials, Industry Funded Trials, and Trials Conducted at Academic Centers Including Trials Targeting EGFR+ Non-Small Cell Lung Cancers

|                                 | <b>AI/AN</b>  | <b>API</b>     | <b>Black</b>  | <b>H/L</b>    | <b>White</b>    |
|---------------------------------|---------------|----------------|---------------|---------------|-----------------|
| <b>All Phase I</b><br>(n=9,273) | 24<br>(0.26%) | 870<br>(9.4%)  | 531<br>(5.7%) | 405<br>(4.4%) | 7560<br>(81.5%) |
| <b>2001-2011</b><br>(n=3,387)   | 10<br>(0.3%)  | 126<br>(3.7%)  | 253<br>(7.5%) | 164<br>(8.9%) | 2906<br>(85.8%) |
| <b>2012-2018</b><br>(n=5,880)   | 14<br>(0.24%) | 744<br>(12.7%) | 278<br>(4.7%) | 241<br>(7.3%) | 4654<br>(79.1%) |
| <b>Industry</b><br>(n=8,215)    | 20<br>(0.24%) | 824<br>(10.0%) | 425<br>(5.2%) | 359<br>(8.2%) | 6698<br>(81.5%) |
| <b>2001-2011</b><br>(n=2,971)   | 10<br>(0.33%) | 107<br>(3.6%)  | 181<br>(6.1%) | 131<br>(9.4%) | 2418<br>(86.6%) |
| <b>2012-2018</b><br>(n=5,426)   | 10<br>(0.18%) | 717<br>(13.2%) | 244<br>(4.5%) | 288<br>(7.7%) | 4280<br>(78.9%) |
| <b>Academic</b><br>(n=7,724)    | 17<br>(0.22%) | 822<br>(10.6%) | 436<br>(5.6%) | 392<br>(9.1%) | 6426<br>(83.2%) |
| <b>2001-2011</b><br>(n=2,826)   | 10<br>(0.35%) | 111<br>(3.9%)  | 205<br>(7.3%) | 139<br>(9.0%) | 2425<br>(85.8%) |
| <b>2012-2018</b><br>(n=5,122)   | 7<br>(0.14%)  | 711<br>(13.9%) | 231<br>(4.5%) | 163<br>(6.1%) | 4001<br>(78.0%) |

**eFigure.** Incidence by Race and Ethnicity in All Phase I Trials Including Trials Targeting EGFR+ Non-Small Cell Lung Cancers

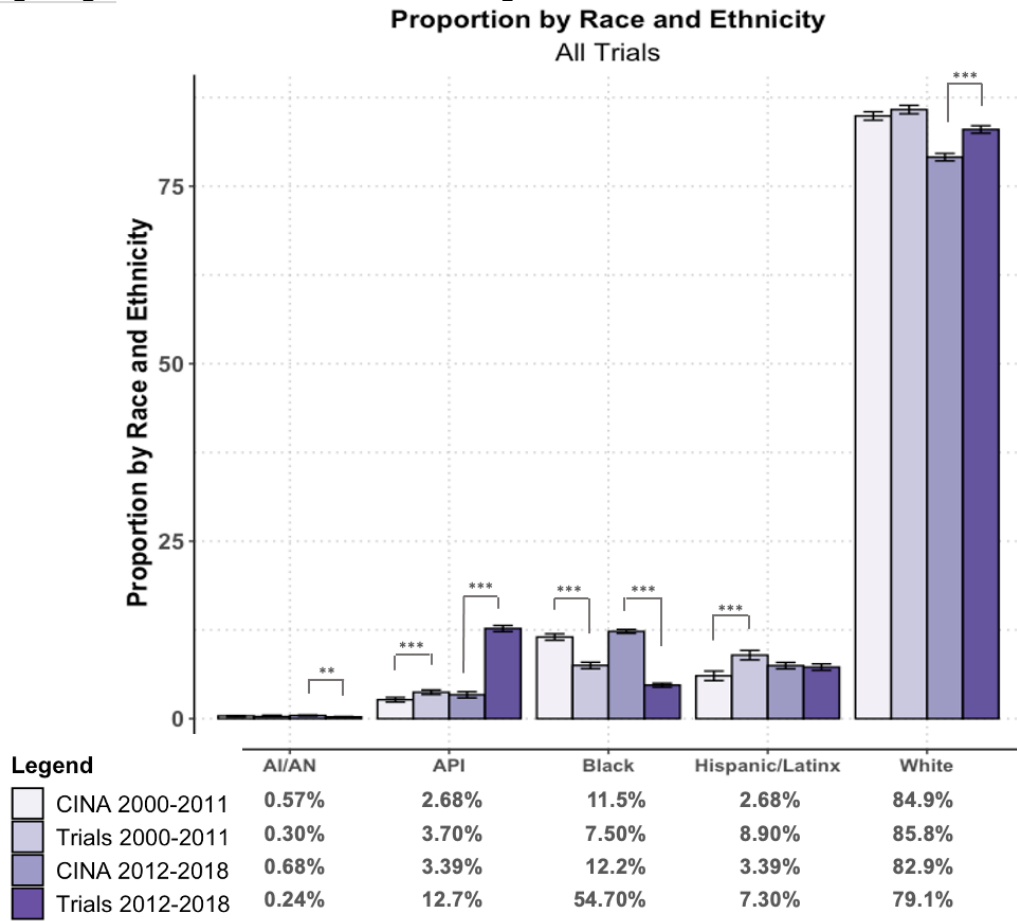

p<0.05\*,p<0.01\*,p<0.001\*\*\*
